# Supplementary material for: Hydrothermal syntheses, luminescent properties, and temperature sensing of monodisperse Tb-doped NaCeF4nanocrystals
Source: Royal Society of Chemistry journal article supplement (doi:10.1039/d0na00763c), 2020-11-28
Supplement: d0na00763c1.pdf [file d0na00763c1.pdf]

## Supplementary information

### Hydrothermal syntheses, luminescent properties, fluorescence intensity ratio temperature sensing of monodisperse Tb doped NaCeF<sub>4</sub> nanocrystals

Haoran Qin,<sup>a,b</sup> Xinghong Gong,<sup>a</sup> Zundu Luo,<sup>a</sup> Yidong Huang<sup>\*a</sup>

a. Key Laboratory of Optoelectronic Materials Chemistry and Physics, Fujian Institute of Research on the Structure of Matter, Chinese Academy of Sciences, Fuzhou, Fujian 350002, China.

b. University of Chinese Academy of Sciences, Beijing 100039, China.

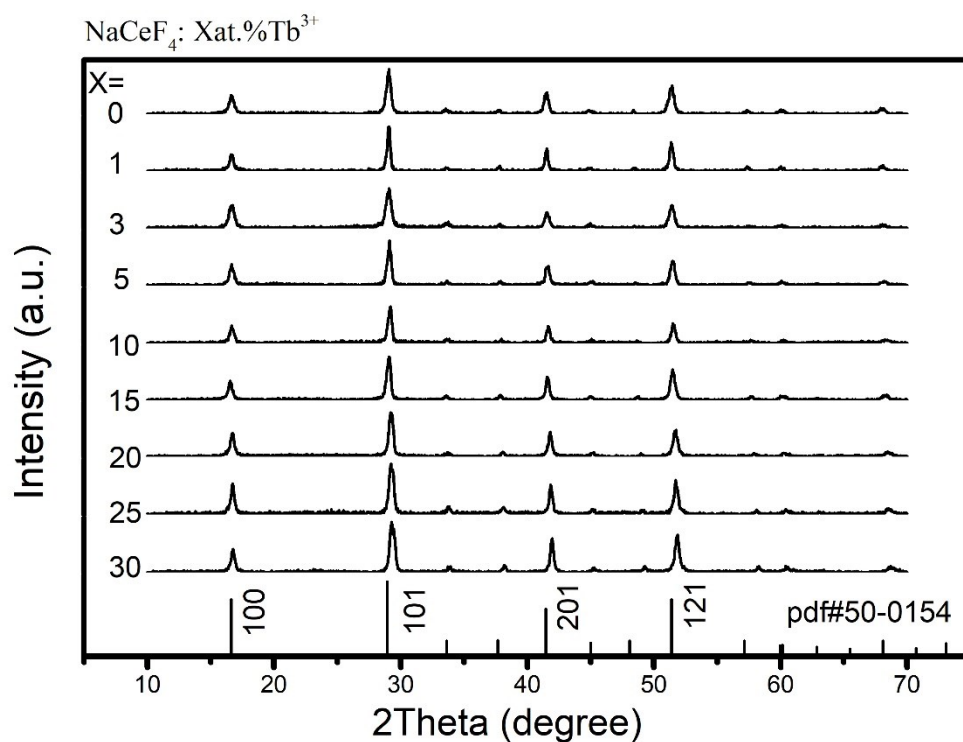

Fig. S1. XRD pattern of NaCeF<sub>4</sub> with different Tb doping concentration. All peaks of the synthesized NCs are matched well with the standard pattern of hexagonal  $\beta$ -NaCeF<sub>4</sub> (pdf#50-0154, black lines) and no other impurity peaks were detected.

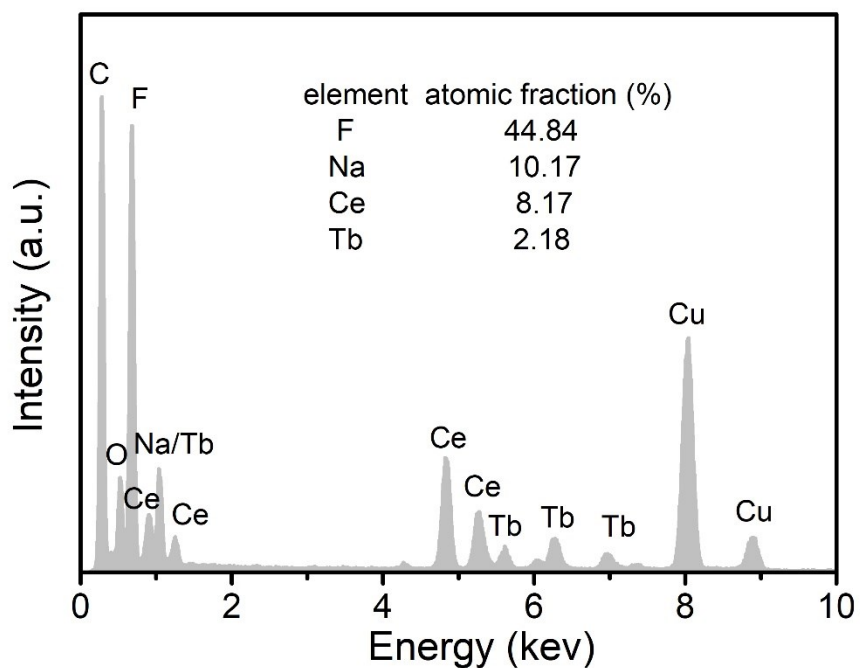

Fig. S2. EDS analysis of  $\text{NaCeF}_4:20\text{at}\%\text{Tb}$  NCs. Elements of C, O, Cu, F, Na, Ce, and Tb were observed in the spectrum, and no other elements were found. Copper element originate from the substrate. Oxygen and carbon elements originate from the capping agent of NCs. The atomic fraction of  $\text{Na}/(\text{Ce}+\text{Tb})$  and  $\text{Ce}/\text{Tb}$  ratio are calculated to be 0.98 and 3.75, respectively, which are roughly in accordance with the stoichiometric ratio of  $\text{NaCeF}_4:20\text{at}\%\text{Tb}$ .

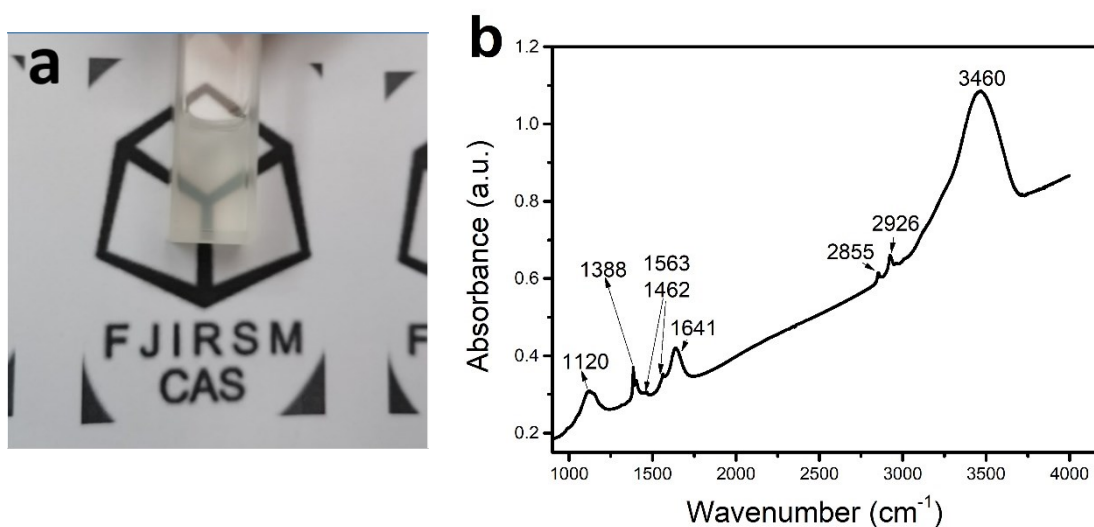

Fig. S3. (a) Photograph of  $\text{NaCeF}_4:20\text{at}\%\text{Tb}$  NCs dispersed in cyclohexane solution. (b) The FTIR spectrum of  $\text{NaCeF}_4:20\text{at}\%\text{Tb}$  NCs. The peak around  $3460\text{ cm}^{-1}$  can be ascribed to the O-H stretching and bending vibration modes. The peaks around  $2926$  and  $2855\text{ cm}^{-1}$  can be ascribed to the asymmetric and symmetric stretching vibration modes of  $-\text{CH}_2-$  in OA, respectively. The peak centered at  $1641\text{ cm}^{-1}$  can be ascribed to the stretching vibration mode of  $\text{C}=\text{C}$  in OA. The peaks centered at  $1563$  and  $1462\text{ cm}^{-1}$  can be attributed to the asymmetric and symmetric stretching vibration modes of  $-\text{COOH}$  in OA, respectively. The peak centered at  $1388\text{ cm}^{-1}$  can be ascribed to the bending vibration mode of  $-\text{CH}_3$  in OA. The peak around  $1120\text{ cm}^{-1}$  can be ascribed to the stretching vibration mode of C-F. The results of FTIR analysis reveal the presence of capping OA on the surfaces of the NCs.

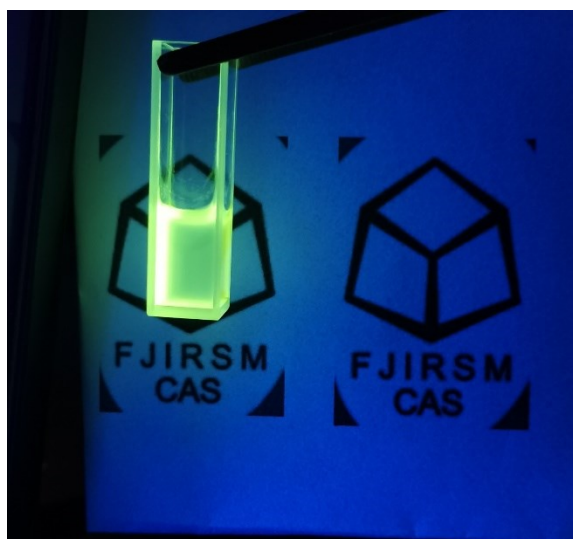

Fig. S4. Luminescence paragraph of  $\text{NaCeF}_4: 20\text{at}\%\text{Tb}$  NCs dissolved in cyclohexane under commercial 254 nm UV lamp excitation.

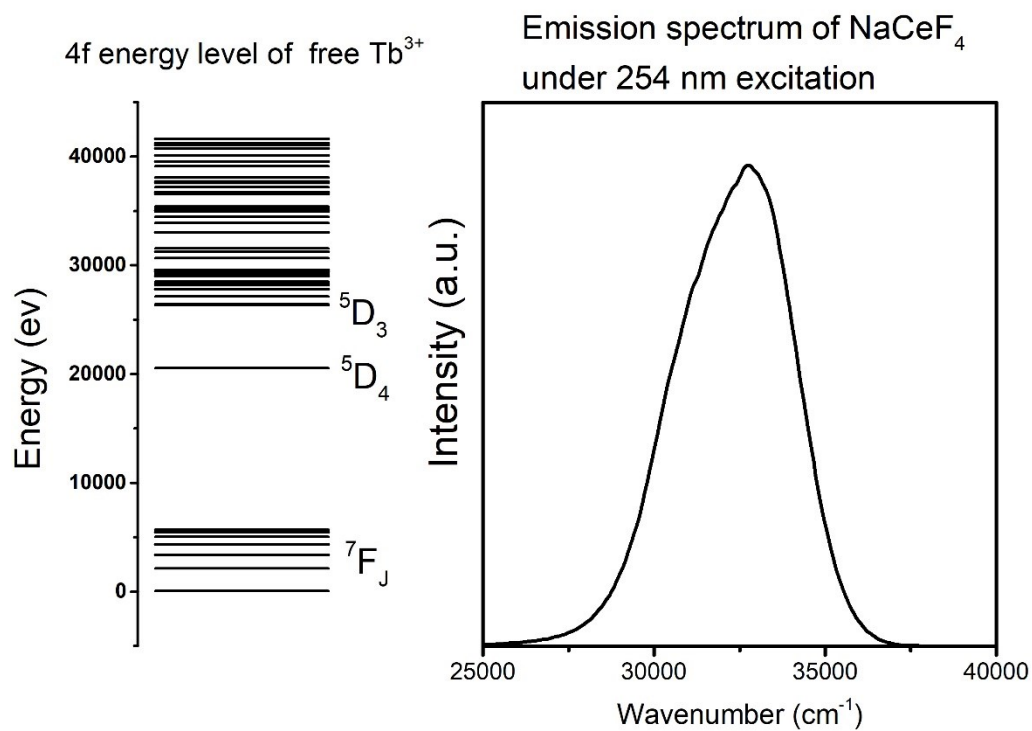

Fig. S5. Left: Energy level diagram of free  $Tb^{3+}$ . Right: Emission spectrum of  $NaCeF_4$  NCs under 254 nm excitation. Obviously, the emission of  $Ce^{3+}$  overlaps with some excited energy levels of  $Tb^{3+}$ .

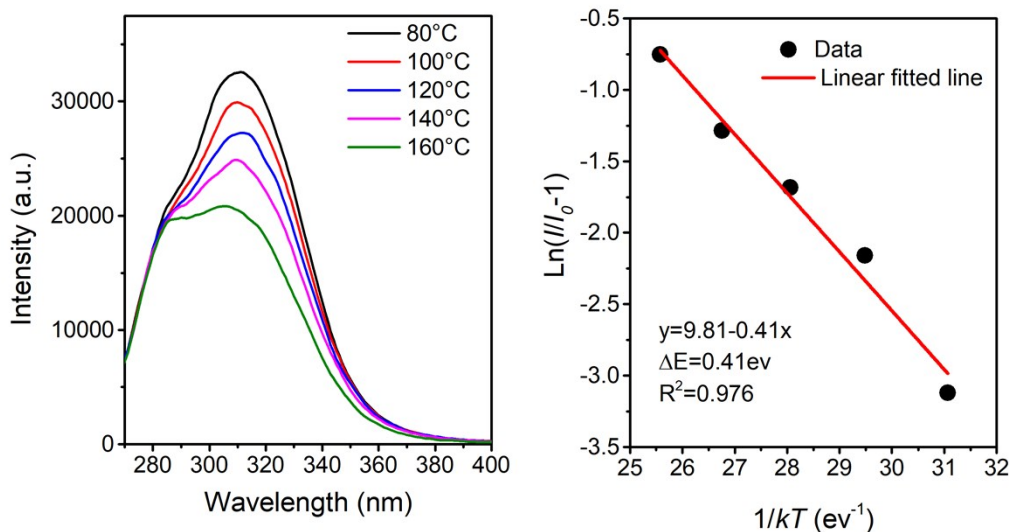

Fig. S6. Left: Temperature dependent luminescent spectra of NaCeF<sub>4</sub>:5at%Tb NCs.

Right:  $\ln\left(\frac{I_0}{I(T)} - 1\right)$  variation with  $\frac{1}{kT}$ .

The emission spectra of NaCeF<sub>4</sub> NCs under 254nm excitation were plotted in Fig. S6 left, the Ce<sup>3+</sup> fluorescence intensity decrease with temperature increasing. The variations of fluorescence intensity with temperature can be expressed by Arrhenius formula:<sup>1,2</sup>

$$I(T) = \frac{I_0}{1 + C \exp\left(-\frac{\Delta E}{kT}\right)}$$

Where  $T$  is temperature (K),  $C$  is a constant,  $k$  is the Boltzmann constant ( $8.63 \times 10^{-5}$  eV/K),  $I$  is integrated fluorescence intensity (270-380 nm) of Ce<sup>3+</sup>,  $\Delta E$  is the activation energy. The above formula can be transferred into:

$$\ln\left(\frac{I_0}{I(T)} - 1\right) = A - \frac{\Delta E}{kT}$$

where  $A$  is a constant. Let  $\frac{1}{kT}$  be  $x$  and  $\ln\left(\frac{I_0}{I(T)} - 1\right)$  be  $y$ , we can plot Fig. S6 right, the dots can be linear fitted and the  $\Delta E$  is therefore calculated to be 0.41eV.

## References

- 1 Y. Zhang, L. Li, X. Zhang and Q. Xi, J. Rare Earth., 2008, **26**, 446-449.

2 K. Jyothi, K. Bhagya, H. Nagabhushana, M. Murugendrappa, A. Prakash, V. Hegde and N. Nagabhushana, *Ceram. Int.*, 2020, **46**, 9706-9713.
